# Supplementary material
Source: PubMed Central journal article supplement (PMC8483748)
Supplement: jci-131-151418-s105.pdf [file jci-131-151418-s105.pdf]

## Supplemental material

### Association of in-hospital use of ACE-I/ARB and COVID-19 outcomes in African American population

Shilong Li<sup>1†</sup>, PhD; Rangaprasad Sarangarajan<sup>2†</sup>, PhD; Tomi Jun<sup>1</sup>, MD; Yu-Han Kao<sup>1</sup>, PhD; Zichen Wang<sup>1</sup>, PhD; Ke Hao<sup>1</sup>, PhD; Emilio Schadt<sup>1</sup>, BS; Michael A. Kiebish<sup>2</sup>, PhD; Elder Granger<sup>2</sup>, MD; Niven R. Narain<sup>2</sup>, PhD; Rong Chen<sup>1,3</sup>, PhD; Eric E. Schadt<sup>1,3\*</sup>, PhD; Li, Li<sup>1,3\*</sup>, MD

<sup>1</sup>Sema4, Stamford, CT, USA.

<sup>2</sup>BERG, 500 Old Connecticut Path, Bldg B 3<sup>rd</sup> Floor, Framingham, MA, USA.

<sup>3</sup>Department of Genetics and Genomic Sciences, The Icahn Institute for Genomics and Multiscale Biology, Icahn School of Medicine at Mount Sinai, New York, NY, USA.

†Authors contributed equally

\*Corresponding authors.

Li Li  
333 Ludlow St., Stamford, CT, 06902  
Ph: 475.333.3720  
E-mail: [li.li@sema4.com](mailto:li.li@sema4.com);

Eric E. Schadt  
333 Ludlow St., Stamford, CT, 06902  
Ph: 475.333.3601  
E-mail: [eric.schadt@sema4.com](mailto:eric.schadt@sema4.com)

**Abbreviations:**

AA, African American

ACE, angiotensin-converting enzyme

ACE1, angiotensin-converting enzyme 1

ACE2, angiotensin-converting enzyme 2

ACE-I, angiotensin-converting enzyme inhibitors

AKI, acute kidney injury

ALT, alanine aminotransferase

ARB, angiotensin receptor blockers

AT1R, angiotensin-II type 1 receptors

BPM, beats per minute

COPD, chronic obstructive pulmonary disease

DBP, diastolic blood pressure

ICU, intensive care unit

IQR, interquartile ranges

RAS, renin-angiotensin system

SBP, systolic blood pressure

SD, standard deviations

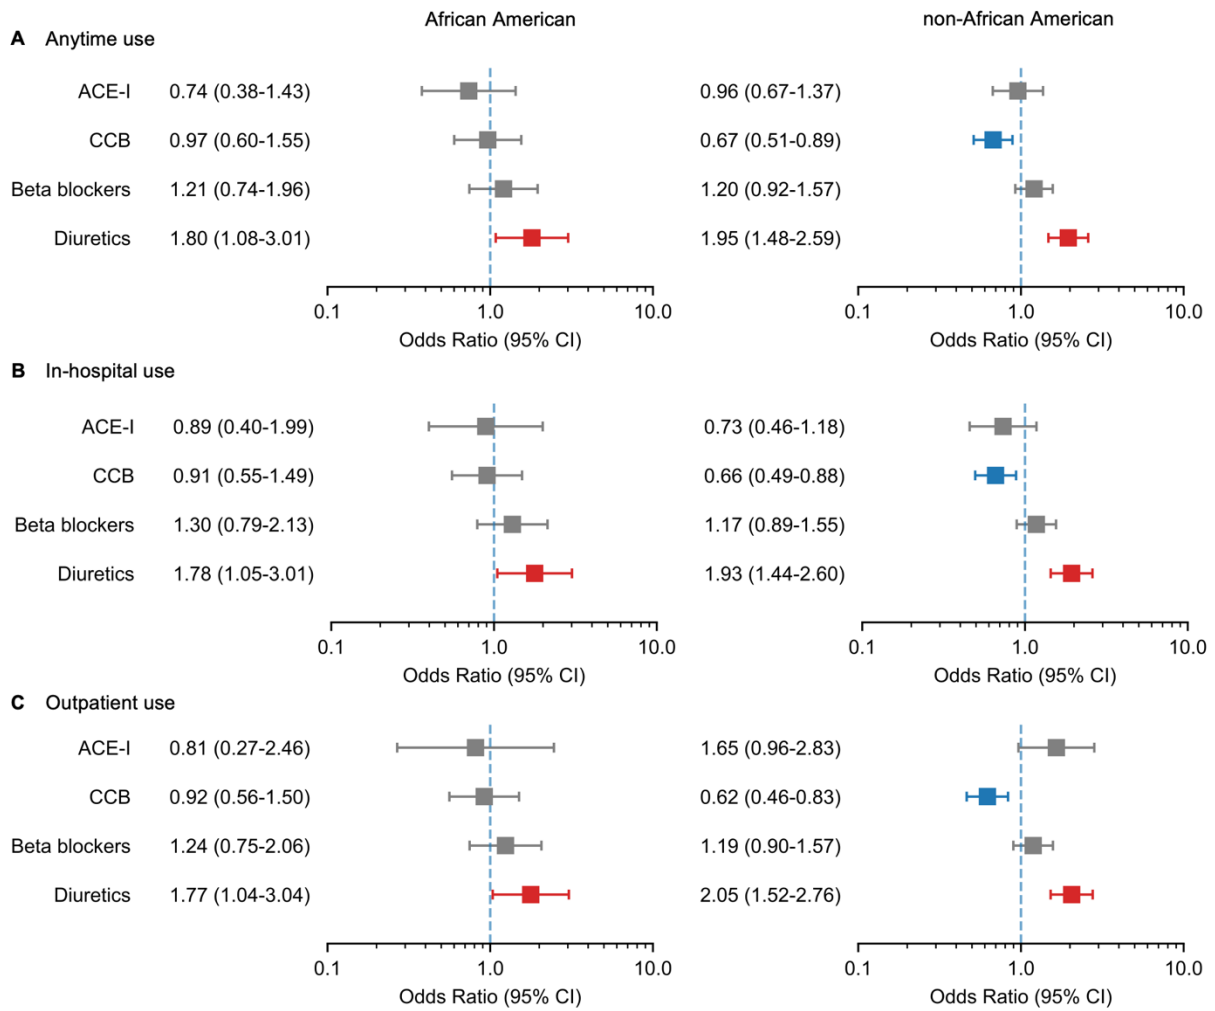

**Figure S1. Different ACE-I exposure times and other antihypertensive drugs, and their associations with COVID-19 in-hospital mortality. (A)** Anytime use, AA (N=1,487), non-AA (N=4,223). **(B)** In-hospital use, AA (N=1,413), non-AA (N=4,032). **(C)** Outpatient use. Number of sample, AA (N=1,406), non-AA (N=3,990). ACE-I, angiotensin-converting enzyme inhibitors; CCB, calcium channel blocker.

**Table S1. Characteristics of COVID-19 patients in ACE-I/ARB and Non-ACE-I/ARB groups for entire population and African American patients**

|                                        | Entire Population |                  |         | African American Patients |                  |         |
|----------------------------------------|-------------------|------------------|---------|---------------------------|------------------|---------|
|                                        | ACE-I/ARB         | Non-ACE-I/ARB    | P-value | ACE-I/ARB                 | Non-ACE-I/ARB    | P-value |
| n                                      | 1139              | 5079             |         | 314                       | 1317             |         |
| <b>Patient Characteristics</b>         |                   |                  |         |                           |                  |         |
| Age, median [Q1,Q3]                    | 68 [60,78]        | 60 [43,72]       | <0.001  | 66 [58,75]                | 59 [43,70]       | <0.001  |
| Sex, n (%)                             |                   |                  | <0.001  |                           |                  | 0.08    |
| Female                                 | 462 (40.6)        | 2407 (47.4)      |         | 150 (47.8)                | 704 (53.5)       |         |
| Male                                   | 677 (59.4)        | 2672 (52.6)      |         | 164 (52.2)                | 613 (46.5)       |         |
| Race, n (%)                            |                   |                  | <0.001  |                           |                  |         |
| White                                  | 225 (19.8)        | 1223 (24.1)      |         | NA                        | NA               |         |
| African American                       | 314 (27.6)        | 1317 (25.9)      |         | NA                        | NA               |         |
| Asian                                  | 64 (5.6)          | 234 (4.6)        |         | NA                        | NA               |         |
| Hispanic                               | 379 (33.3)        | 1434 (28.2)      |         | NA                        | NA               |         |
| Other                                  | 139 (12.2)        | 708 (13.9)       |         | NA                        | NA               |         |
| Unknown                                | 18 (1.6)          | 163 (3.2)        |         | NA                        | NA               |         |
| BMI (kg/m <sup>2</sup> ), mean (SD)    | 29.2 (7.3)        | 28.7 (7.7)       | 0.020   | 30.3 (8.0)                | 30.2 (8.9)       | 0.817   |
| Smoking status, n (%)                  |                   |                  | <0.001  |                           |                  | <0.001  |
| Never                                  | 575 (50.5)        | 2798 (55.1)      |         | 147 (46.8)                | 712 (54.1)       |         |
| Quit                                   | 387 (34.0)        | 796 (15.7)       |         | 119 (37.9)                | 220 (16.7)       |         |
| Yes                                    | 64 (5.6)          | 202 (4.0)        |         | 23 (7.3)                  | 80 (6.1)         |         |
| Not Asked                              | 113 (9.9)         | 1283 (25.3)      |         | 25 (8.0)                  | 305 (23.2)       |         |
| Temperature (F), mean (SD)             | 98.9 (1.5)        | 99.0 (1.8)       | 0.537   | 98.9 (1.7)                | 98.8 (1.5)       | 0.446   |
| Max. temperature (F), mean (SD)        | 100.8 (1.8)       | 100.3 (2.0)      | <0.001  | 100.7 (1.8)               | 100.1 (2.0)      | <0.001  |
| O2 saturation (%), median [Q1,Q3]      | 96.0 [93.0,98.0]  | 97.0 [94.0,99.0] | <0.001  | 96.5 [94.0,98.0]          | 97.0 [95.0,99.0] | <0.001  |
| Min. O2 saturation (%), median [Q1,Q3] | 90.0 [82.0,93.0]  | 92.0 [86.0,97.0] | <0.001  | 90.5 [84.8,94.0]          | 93.0 [88.0,98.0] | <0.001  |
| Heart rate (BPM), mean (SD)            | 93.0 (19.8)       | 95.7 (19.8)      | <0.001  | 94.8 (18.7)               | 96.1 (18.4)      | 0.247   |
| Respiratory rate >25, n (%)            | 145 (12.7)        | 593 (11.7)       | 0.345   | 34 (10.8)                 | 108 (8.2)        | 0.170   |
| High BP (SBP>140 or DBP>90), n (%)     | 491 (43.1)        | 1588 (31.3)      | <0.001  | 151 (48.1)                | 482 (36.6)       | <0.001  |
| <b>Antihypertensive Medications</b>    |                   |                  |         |                           |                  |         |
| Calcium-channel blockers, n (%)        | 613 (53.8)        | 936 (18.4)       | <0.001  | 179 (57.0)                | 285 (21.6)       | <0.001  |
| Beta blockers, n (%)                   | 543 (47.7)        | 926 (18.2)       | <0.001  | 151 (48.1)                | 252 (19.1)       | <0.001  |
| Diuretics, n (%)                       | 642 (56.4)        | 959 (18.9)       | <0.001  | 176 (56.1)                | 246 (18.7)       | <0.001  |
| <b>Comorbidities</b>                   |                   |                  |         |                           |                  |         |

|                                      |                  |                  |        |                  |                  |        |
|--------------------------------------|------------------|------------------|--------|------------------|------------------|--------|
| Asthma, n (%)                        | 95 (8.3)         | 189 (3.7)        | <0.001 | 29 (9.2)         | 61 (4.6)         | 0.002  |
| COPD, n (%)                          | 65 (5.7)         | 121 (2.4)        | <0.001 | 29 (9.2)         | 36 (2.7)         | <0.001 |
| Hypertension, n (%)                  | 690 (60.6)       | 928 (18.3)       | <0.001 | 205 (65.3)       | 261 (19.8)       | <0.001 |
| Obstructive Sleep Apnea, n (%)       | 57 (5.0)         | 49 (1.0)         | <0.001 | 20 (6.4)         | 17 (1.3)         | <0.001 |
| Obesity, n (%)                       | 170 (14.9)       | 266 (5.2)        | <0.001 | 62 (19.7)        | 83 (6.3)         | <0.001 |
| Diabetes, n (%)                      | 457 (40.1)       | 575 (11.3)       | <0.001 | 141 (44.9)       | 156 (11.8)       | <0.001 |
| Chronic Kidney Disease, n (%)        | 217 (19.1)       | 322 (6.3)        | <0.001 | 78 (24.8)        | 110 (8.4)        | <0.001 |
| HIV, n (%)                           | 23 (2.0)         | 61 (1.2)         | 0.043  | 13 (4.1)         | 22 (1.7)         | 0.013  |
| Cancer, n (%)                        | 135 (11.9)       | 299 (5.9)        | <0.001 | 50 (15.9)        | 65 (4.9)         | <0.001 |
| Coronary Artery Disease, n (%)       | 273 (24.0)       | 291 (5.7)        | <0.001 | 58 (18.5)        | 59 (4.5)         | <0.001 |
| Atrial Fibrillation, n (%)           | 134 (11.8)       | 168 (3.3)        | <0.001 | 33 (10.5)        | 32 (2.4)         | <0.001 |
| Heart Failure, n (%)                 | 186 (16.3)       | 153 (3.0)        | <0.001 | 53 (16.9)        | 48 (3.6)         | <0.001 |
| Chronic Viral Hepatitis, n (%)       | 17 (1.5)         | 37 (0.7)         | 0.020  | 11 (3.5)         | 13 (1.0)         | 0.003  |
| Liver Disease, n (%)                 | 36 (3.2)         | 80 (1.6)         | 0.001  | 12 (3.8)         | 11 (0.8)         | <0.001 |
| Acute Kidney Injury, n (%)           | 99 (8.7)         | 241 (4.7)        | <0.001 | 31 (9.9)         | 77 (5.8)         | 0.014  |
| <b>Labs</b>                          |                  |                  |        |                  |                  |        |
| WBC (K/uL), median [Q1,Q3]           | 7.2 [5.4,10.4]   | 7.6 [5.6,10.7]   | 0.012  | 6.6 [5.0,9.4]    | 7.5 [5.4,10.2]   | 0.002  |
| CREATININE > 1.2, n (%)              | 514 (45.1)       | 1347 (26.5)      | <0.001 | 171 (54.5)       | 432 (32.8)       | <0.001 |
| ANION GAP (mEq/L), mean (SD)         | 13.1 (4.2)       | 12.9 (4.3)       | 0.166  | 13.5 (5.3)       | 13.4 (4.8)       | 0.832  |
| POTASSIUM (mmol/L), mean (SD)        | 4.4 (0.8)        | 4.4 (0.8)        | 0.004  | 4.5 (0.9)        | 4.4 (0.9)        | 0.115  |
| ALT (U/L), median [Q1,Q3]            | 27.0 [17.0,45.5] | 30.0 [19.0,52.0] | <0.001 | 22.0 [15.0,38.0] | 27.0 [17.0,46.0] | 0.001  |
| <b>Hospital Conditions</b>           |                  |                  |        |                  |                  |        |
| ICU, n (%)                           | 236 (20.7)       | 749 (14.7)       | <0.001 | 55 (17.5)        | 167 (12.7)       | 0.031  |
| Days after infection, median [Q1,Q3] | 5.7 [2.5,9.7]    | 3.6 [0.6,8.0]    | <0.001 | 5.7 [2.6,9.7]    | 3.5 [0.6,7.9]    | <0.001 |
| Hospital status, n (%)               |                  |                  | <0.001 |                  |                  | <0.001 |
| Still Hospitalized                   | 131 (11.5)       | 377 (7.4)        |        | 45 (14.3)        | 99 (7.5)         |        |
| Deceased                             | 287 (25.2)       | 1039 (20.5)      |        | 61 (19.4)        | 239 (18.1)       |        |
| Discharged                           | 721 (63.3)       | 3663 (72.1)      |        | 208 (66.2)       | 979 (74.3)       |        |

Abbreviations: BPM, beats per minute; SBP, systolic blood pressure; DBP, diastolic blood pressure; ACE-I, angiotensin-converting enzyme inhibitors; ARBs, angiotensin receptor blockers; COPD, chronic obstructive pulmonary disease; ALT, alanine aminotransferase.

**Table S2. Characteristics of COVID-19 patients in African American and non-African American population**

|                                                    | <b>African American</b> | <b>Non-African American</b> | <b>P-Value</b> |
|----------------------------------------------------|-------------------------|-----------------------------|----------------|
| <b>n</b>                                           | 1631                    | 4584                        |                |
| <b>Antihypertensive Medications</b>                |                         |                             |                |
| ACE-I/ARB, n (%)                                   | 314 (19.3)              | 825 (18.0)                  | 0.277          |
| ACE-I, n (%)                                       | 161 (9.9)               | 444 (9.7)                   | 0.866          |
| ARB, n (%)                                         | 171 (10.5)              | 426 (9.3)                   | 0.176          |
| Calcium-channel blockers, n (%)                    | 464 (28.4)              | 1085 (23.7)                 | <0.001         |
| Beta blockers, n (%)                               | 403 (24.7)              | 1066 (23.3)                 | 0.249          |
| Diuretics, n (%)                                   | 422 (25.9)              | 1179 (25.7)                 | 0.929          |
| <b>Patient Characteristics</b>                     |                         |                             |                |
| Age, median [Q1,Q3]                                | 61 [47,72]              | 62 [46,75]                  | 0.012          |
| Sex, n (%)                                         |                         |                             | <0.001         |
| Female                                             | 854 (52.4)              | 2015 (44.0)                 |                |
| Male                                               | 777 (47.6)              | 2569 (56.0)                 |                |
| BMI (kg/m <sup>2</sup> ), mean (SD)                | 30.2 (8.7)              | 28.3 (7.1)                  | <0.001         |
| Smoking status, n (%)                              |                         |                             | <0.001         |
| Never                                              | 859 (52.7)              | 2514 (54.8)                 |                |
| Not Asked                                          | 330 (20.2)              | 1063 (23.2)                 |                |
| Quit                                               | 339 (20.8)              | 844 (18.4)                  |                |
| Yes                                                | 103 (6.3)               | 163 (3.6)                   |                |
| Temperature (F), mean (SD)                         | 98.9 (1.6)              | 99.0 (1.8)                  | 0.02           |
| Max. temperature (F), mean (SD)                    | 100.2 (2.0)             | 100.5 (2.0)                 | <0.001         |
| O <sub>2</sub> saturation (%), median [Q1,Q3]      | 97.0 [95.0,99.0]        | 96.0 [93.0,98.0]            | <0.001         |
| Min. O <sub>2</sub> saturation (%), median [Q1,Q3] | 92.0 [87.0,97.0]        | 91.0 [84.0,96.0]            | <0.001         |
| Heart rate (BPM), mean (SD)                        | 95.9 (18.4)             | 95.0 (20.2)                 | 0.116          |
| Respiratory rate >25, n (%)                        | 142 (8.7)               | 596 (13.0)                  | <0.001         |
| High BP (SBP>140 or DBP>90), n (%)                 | 633 (38.8)              | 1446 (31.5)                 | <0.001         |
| <b>Comorbidities</b>                               |                         |                             |                |
| Asthma, n (%)                                      | 90 (5.5)                | 194 (4.2)                   | 0.039          |
| COPD, n (%)                                        | 65 (4.0)                | 121 (2.6)                   | 0.008          |
| Hypertension, n (%)                                | 466 (28.6)              | 1152 (25.1)                 | 0.007          |
| Obstructive Sleep Apnea, n (%)                     | 37 (2.3)                | 69 (1.5)                    | 0.053          |
| Obesity, n (%)                                     | 145 (8.9)               | 291 (6.3)                   | 0.001          |
| Diabetes, n (%)                                    | 297 (18.2)              | 735 (16.0)                  | 0.047          |
| Chronic Kidney Disease, n (%)                      | 188 (11.5)              | 351 (7.7)                   | <0.001         |
| HIV, n (%)                                         | 35 (2.1)                | 49 (1.1)                    | 0.002          |
| Cancer, n (%)                                      | 115 (7.1)               | 319 (7.0)                   | 0.945          |
| Coronary Artery Disease, n (%)                     | 117 (7.2)               | 447 (9.8)                   | 0.002          |
| Atrial Fibrillation, n (%)                         | 65 (4.0)                | 237 (5.2)                   | 0.065          |
| Heart Failure, n (%)                               | 101 (6.2)               | 238 (5.2)                   | 0.143          |
| Chronic Viral Hepatitis, n (%)                     | 24 (1.5)                | 30 (0.7)                    | 0.004          |
| Liver Disease, n (%)                               | 23 (1.4)                | 93 (2.0)                    | 0.139          |
| Acute Kidney Injury, n (%)                         | 108 (6.6)               | 232 (5.1)                   | 0.021          |
| <b>Labs</b>                                        |                         |                             |                |
| WBC (K/uL), median [Q1,Q3]                         | 7.3 [5.3,10.0]          | 7.7 [5.6,10.8]              | 0.001          |
| Creatinine > 1.2, n (%)                            | 603 (37.0)              | 1258 (27.4)                 | <0.001         |
| Anion Gap (mEq/L), mean (SD)                       | 13.4 (4.9)              | 12.8 (4.0)                  | <0.001         |

|                                      |                  |                  |        |
|--------------------------------------|------------------|------------------|--------|
| Potassium (mmol/L), mean (SD)        | 4.4 (0.9)        | 4.4 (0.8)        | 0.023  |
| ALT (U/L), median [Q1,Q3]            | 25.0 [17.0,45.0] | 30.0 [19.0,53.0] | <0.001 |
| <b>Hospital Conditions</b>           |                  |                  |        |
| ICU, n (%)                           | 222 (13.6)       | 763 (16.6)       | 0.004  |
| Days after infection, median [Q1,Q3] | 3.8 [0.6,8.5]    | 3.8 [0.7,8.6]    | 0.407  |
| Hospital status, n (%)               |                  |                  | 0.003  |
| Censored                             | 144 (8.8)        | 364 (7.9)        |        |
| Deceased                             | 300 (18.4)       | 1026 (22.4)      |        |
| Discharged                           | 1187 (72.8)      | 3194 (69.7)      |        |

Abbreviations: ACE-I, angiotensin-converting enzyme inhibitors; ARB, angiotensin receptor blockers; BPM, beats per minute; SBP, systolic blood pressure; DBP, diastolic blood pressure; COPD, chronic obstructive pulmonary disease; ALT, alanine aminotransferase.

**Table S3. Adjusted odds ratios for COVID-19 in-hospital mortality in different race groups associated with ACE-I/ARB and other covariates**

|                                     | All Races (N=5,710)  |         | African American (N=1,487) |         | Non-African American (N=4,223) |         |
|-------------------------------------|----------------------|---------|----------------------------|---------|--------------------------------|---------|
|                                     | Adjusted OR (95% CI) | p-value | Adjusted OR (95% CI)       | p-value | Adjusted OR (95% CI)           | p-value |
| <b>Antihypertensive Medications</b> |                      |         |                            |         |                                |         |
| ACE-I/ARB                           | 0.655 (0.505-0.850)  | 0.001   | 0.440 (0.249-0.779)        | 0.005   | 0.748 (0.553-1.012)            | 0.060   |
| Calcium-channel blockers            | 0.784 (0.620-0.992)  | 0.043   | 1.029 (0.638-1.662)        | 0.905   | 0.695 (0.527-0.916)            | 0.010   |
| Beta blockers                       | 1.212 (0.964-1.522)  | 0.100   | 1.219 (0.748-1.986)        | 0.427   | 1.226 (0.940-1.600)            | 0.133   |
| Diuretics                           | 2.077 (1.621-2.664)  | <0.001  | 2.063 (1.218-3.494)        | 0.007   | 2.054 (1.543-2.735)            | <0.001  |
| <b>Patient Characteristics</b>      |                      |         |                            |         |                                |         |
| Age                                 | 1.082 (1.071-1.093)  | <0.001  | 1.092 (1.069-1.116)        | <0.001  | 1.083 (1.070-1.095)            | <0.001  |
| Male                                | 1.071 (0.855-1.342)  | 0.550   | 1.234 (0.759-2.006)        | 0.397   | 1.051 (0.809-1.366)            | 0.708   |
| Race: African American              | 0.685 (0.507-0.925)  | 0.013   | N/A                        | N/A     | N/A                            | N/A     |
| Race: Asian                         | 0.720 (0.415-1.247)  | 0.241   | N/A                        | N/A     | N/A                            | N/A     |
| Race: Hispanic                      | 0.793 (0.593-1.061)  | 0.118   | N/A                        | N/A     | N/A                            | N/A     |
| Race: Other                         | 0.708 (0.497-1.008)  | 0.056   | N/A                        | N/A     | N/A                            | N/A     |
| Race: Unknown                       | 0.677 (0.349-1.315)  | 0.249   | N/A                        | N/A     | N/A                            | N/A     |
| Smoking Status: Not Asked           | 1.161 (0.864-1.557)  | 0.322   | 1.259 (0.674-2.351)        | 0.470   | 1.037 (0.736-1.459)            | 0.836   |
| Smoking Status: Quit                | 1.122 (0.861-1.462)  | 0.397   | 1.059 (0.597-1.876)        | 0.846   | 1.119 (0.822-1.520)            | 0.476   |
| Smoking Status: Yes                 | 1.531 (0.902-2.599)  | 0.114   | 3.504 (1.398-8.785)        | 0.007   | 0.798 (0.393-1.618)            | 0.532   |
| BMI                                 | 1.008 (0.993-1.023)  | 0.301   | 1.015 (0.986-1.045)        | 0.306   | 1.006 (0.987-1.024)            | 0.544   |
| Temperature                         | 0.974 (0.923-1.028)  | 0.342   | 0.924 (0.791-1.080)        | 0.321   | 0.984 (0.928-1.044)            | 0.597   |
| Max. Temperature                    | 1.218 (1.139-1.302)  | <0.001  | 1.186 (1.025-1.373)        | 0.021   | 1.237 (1.146-1.338)            | <0.001  |
| O2 Saturation                       | 0.999 (0.982-1.017)  | 0.919   | 0.985 (0.947-1.025)        | 0.472   | 1.007 (0.987-1.027)            | 0.506   |
| Min. O2 Saturation                  | 0.936 (0.927-0.945)  | <0.001  | 0.948 (0.933-0.964)        | <0.001  | 0.930 (0.919-0.941)            | <0.001  |
| Heart Rate                          | 1.004 (0.998-1.010)  | 0.167   | 1.000 (0.988-1.013)        | 0.943   | 1.004 (0.998-1.011)            | 0.213   |
| Respiratory Rate > 25               | 1.411 (1.053-1.887)  | 0.021   | 1.579 (0.788-3.165)        | 0.197   | 1.395 (1.003-1.941)            | 0.048   |
| High BP (SBP>140 or DBP>90)         | 0.881 (0.705-1.100)  | 0.263   | 0.842 (0.528-1.344)        | 0.472   | 0.887 (0.683-1.153)            | 0.369   |
| <b>Comorbidities</b>                |                      |         |                            |         |                                |         |
| Asthma                              | 0.501 (0.296-0.850)  | 0.010   | 0.374 (0.121-1.161)        | 0.089   | 0.523 (0.280-0.976)            | 0.042   |
| COPD                                | 1.359 (0.824-2.241)  | 0.229   | 1.094 (0.415-2.889)        | 0.856   | 1.462 (0.793-2.697)            | 0.223   |
| Hypertension                        | 0.901 (0.688-1.179)  | 0.447   | 0.671 (0.366-1.231)        | 0.197   | 0.999 (0.734-1.361)            | 0.997   |
| Obstructive Sleep Apnea             | 1.611 (0.779-3.333)  | 0.199   | 0.795 (0.187-3.370)        | 0.755   | 1.980 (0.841-4.660)            | 0.118   |



|                            |                     |        |                      |        |                     |        |
|----------------------------|---------------------|--------|----------------------|--------|---------------------|--------|
| Obesity                    | 1.124 (0.733-1.723) | 0.592  | 2.477 (1.083-5.663)  | 0.032  | 0.829 (0.490-1.404) | 0.485  |
| Diabetes                   | 1.081 (0.814-1.436) | 0.591  | 1.471 (0.803-2.694)  | 0.212  | 0.942 (0.677-1.311) | 0.724  |
| Chronic Kidney Disease     | 1.115 (0.780-1.594) | 0.548  | 1.125 (0.571-2.214)  | 0.734  | 1.107 (0.718-1.707) | 0.643  |
| HIV                        | 1.763 (0.749-4.150) | 0.194  | 1.077 (0.172-6.753)  | 0.937  | 2.312 (0.831-6.437) | 0.108  |
| Cancer                     | 1.342 (0.951-1.893) | 0.094  | 2.323 (1.138-4.740)  | 0.021  | 1.095 (0.728-1.649) | 0.661  |
| Coronary Artery Disease    | 1.070 (0.767-1.492) | 0.691  | 1.788 (0.840-3.804)  | 0.132  | 0.927 (0.633-1.357) | 0.696  |
| Atrial Fibrillation        | 0.927 (0.624-1.377) | 0.708  | 1.430 (0.563-3.633)  | 0.452  | 0.869 (0.553-1.366) | 0.544  |
| Heart Failure              | 0.971 (0.643-1.467) | 0.889  | 0.607 (0.243-1.517)  | 0.285  | 1.046 (0.648-1.687) | 0.855  |
| Liver Disease              | 1.489 (0.772-2.872) | 0.235  | 1.766 (0.355-8.785)  | 0.487  | 1.636 (0.800-3.347) | 0.178  |
| Acute Kidney Injury        | 1.078 (0.723-1.606) | 0.714  | 0.589 (0.268-1.292)  | 0.186  | 1.499 (0.919-2.450) | 0.105  |
| <b>Labs</b>                |                     |        |                      |        |                     |        |
| WBC                        | 1.018 (0.997-1.040) | 0.094  | 1.015 (0.968-1.064)  | 0.540  | 1.019 (0.995-1.045) | 0.122  |
| Creatinine > 1.2           | 1.732 (1.342-2.234) | <0.001 | 1.744 (1.004-3.028)  | 0.049  | 1.699 (1.266-2.280) | <0.001 |
| Anion Gap                  | 1.079 (1.050-1.110) | <0.001 | 1.052 (1.003-1.104)  | 0.038  | 1.104 (1.065-1.146) | <0.001 |
| Potassium                  | 1.174 (1.028-1.339) | 0.017  | 1.117 (0.877-1.425)  | 0.369  | 1.204 (1.022-1.418) | 0.026  |
| ALT                        | 1.001 (1.000-1.002) | 0.184  | 1.002 (0.999-1.006)  | 0.172  | 1.001 (0.999-1.002) | 0.449  |
| <b>Hospital Conditions</b> |                     |        |                      |        |                     |        |
| ICU                        | 3.881 (2.930-5.140) | <0.001 | 8.109 (4.336-15.165) | <0.001 | 3.062 (2.217-4.229) | <0.001 |
| Duration (days)            | 0.966 (0.950-0.982) | <0.001 | 0.972 (0.939-1.008)  | 0.126  | 0.963 (0.945-0.981) | <0.001 |

Abbreviations: ACE-I, angiotensin-converting enzyme inhibitors; ARB, angiotensin receptor blockers; SBP, systolic blood pressure; DBP, diastolic blood pressure; COPD, chronic obstructive pulmonary disease; ALT, alanine aminotransferase.

**Table S4. Interaction between ACE-I/ARB and African American population from multivariable logistic regression also adjusted by other confounders**

| Interaction Terms    | Anytime use          |         | In-hospital use      |         | Outpatient use       |         |
|----------------------|----------------------|---------|----------------------|---------|----------------------|---------|
|                      | Adjusted OR (95% CI) | p-value | Adjusted OR (95% CI) | p-value | Adjusted OR (95% CI) | p-value |
| <i>ACE-I/ARB use</i> |                      |         |                      |         |                      |         |
| ACE-I/ARB            | 0.708 (0.528-0.949)  | 0.021   | 0.605 (0.420-0.871)  | 0.007   | 1.122 (0.726-1.732)  | 0.605   |
| ACE-I/ARB * AA       | 0.736 (0.428-1.266)  | 0.268   | 0.825 (0.413-1.648)  | 0.585   | 0.695 (0.311-1.550)  | 0.373   |
| AA                   | 0.896 (0.672-1.193)  | 0.451   | 0.897 (0.673-1.198)  | 0.463   | 0.879 (0.660-1.172)  | 0.381   |
| <i>ACE-I use</i>     |                      |         |                      |         |                      |         |
| ACE-I                | 0.908 (0.640-1.287)  | 0.588   | 0.662 (0.414-1.058)  | 0.085   | 1.661 (0.983-2.807)  | 0.058   |
| ACE-I * AA           | 0.817 (0.413-1.617)  | 0.562   | 1.375 (0.572-3.303)  | 0.476   | 0.490 (0.168-1.426)  | 0.191   |
| AA                   | 0.844 (0.648-1.101)  | 0.212   | 0.836 (0.640-1.092)  | 0.188   | 0.832 (0.638-1.085)  | 0.176   |
| <i>ARB use</i>       |                      |         |                      |         |                      |         |
| ARB                  | 0.708 (0.493-1.016)  | 0.061   | 0.669 (0.419-1.068)  | 0.092   | 0.998 (0.581-1.712)  | 0.993   |
| ARB * AA             | 0.797 (0.403-1.577)  | 0.516   | 0.488 (0.185-1.292)  | 0.149   | 1.299 (0.477-3.540)  | 0.609   |
| AA                   | 0.854 (0.654-1.114)  | 0.244   | 0.863 (0.661-1.126)  | 0.278   | 0.842 (0.645-1.099)  | 0.206   |

**Note:** among patients of anytime use, the odds ratio of in-hospital death in AA population who received ACE-I/ARB compared to non-AA population who also received ACE-I/ARB is calculated as  $0.736 \times 0.896 = 0.659$ ; among patients of in-hospital use, the odds ratio of in hospital-death in AA population who received ARB compared to non-AA population who also received ARB is calculated as  $0.488 \times 0.863 = 0.421$

**Table S5. Adjusted odds ratios of secondary outcomes for African American COVID-19 patients associated with ACE-I/ARB and other covariates**

|                                     | ICU (N=1,487)        |         | AKI (N=1,487)           |         |
|-------------------------------------|----------------------|---------|-------------------------|---------|
|                                     | Adjusted OR (95% CI) | p-value | Adjusted OR (95% CI)    | p-value |
| <b>Antihypertensive Medications</b> |                      |         |                         |         |
| ACE-I/ARB                           | 0.709 (0.419-1.198)  | 0.198   | 1.306 (0.721-2.364)     | 0.379   |
| Calcium-channel blockers            | 0.953 (0.599-1.514)  | 0.838   | 1.043 (0.617-1.762)     | 0.876   |
| Beta blockers                       | 1.986 (1.253-3.146)  | 0.003   | 1.671 (0.989-2.824)     | 0.055   |
| Diuretics                           | 4.728 (2.918-7.660)  | <0.001  | 0.590 (0.325-1.071)     | 0.083   |
| <b>Patient Characteristics</b>      |                      |         |                         |         |
| Age                                 | 0.985 (0.969-1.002)  | 0.082   | 0.994 (0.974-1.015)     | 0.563   |
| Male                                | 1.102 (0.692-1.755)  | 0.682   | 0.954 (0.557-1.631)     | 0.862   |
| Smoking Status: Not Asked           | 2.437 (1.362-4.360)  | 0.003   | 1.173 (0.597-2.307)     | 0.644   |
| Smoking Status: Quit                | 1.020 (0.582-1.787)  | 0.946   | 0.763 (0.402-1.448)     | 0.407   |
| Smoking Status: Yes                 | 2.595 (1.127-5.976)  | 0.025   | 0.776 (0.261-2.313)     | 0.649   |
| BMI                                 | 1.034 (1.008-1.060)  | 0.011   | 0.988 (0.956-1.020)     | 0.455   |
| Temperature                         | 0.755 (0.655-0.872)  | <0.001  | 0.910 (0.759-1.090)     | 0.307   |
| Max. Temperature                    | 1.510 (1.310-1.740)  | <0.001  | 0.857 (0.716-1.026)     | 0.093   |
| O2 Saturation                       | 0.996 (0.963-1.029)  | 0.793   | 0.976 (0.941-1.013)     | 0.206   |
| Min. O2 Saturation                  | 0.970 (0.960-0.981)  | <0.001  | 0.999 (0.984-1.014)     | 0.877   |
| Heart Rate                          | 1.009 (0.997-1.021)  | 0.163   | 1.001 (0.988-1.014)     | 0.939   |
| Respiratory Rate > 25               | 2.138 (1.156-3.954)  | 0.015   | 1.070 (0.518-2.211)     | 0.855   |
| High BP (SBP>140 or DBP>90)         | 0.891 (0.567-1.399)  | 0.615   | 0.735 (0.431-1.253)     | 0.257   |
| <b>Comorbidities</b>                |                      |         |                         |         |
| Asthma                              | 0.891 (0.352-2.257)  | 0.808   | 3.210 (1.212-8.499)     | 0.019   |
| COPD                                | 0.557 (0.201-1.544)  | 0.261   | 1.517 (0.400-5.742)     | 0.540   |
| Hypertension                        | 0.873 (0.488-1.563)  | 0.649   | 1.675 (0.867-3.237)     | 0.125   |
| Obstructive Sleep Apnea             | 2.457 (0.848-7.121)  | 0.098   | 0.211 (0.022-1.986)     | 0.174   |
| Obesity                             | 0.468 (0.214-1.025)  | 0.058   | 1.491 (0.611-3.641)     | 0.380   |
| Diabetes                            | 1.513 (0.873-2.622)  | 0.140   | 0.644 (0.345-1.200)     | 0.166   |
| Chronic Kidney Disease              | 0.371 (0.179-0.770)  | 0.008   | 0.858 (0.443-1.663)     | 0.650   |
| HIV                                 | 1.963 (0.537-7.173)  | 0.308   | 0.918 (0.217-3.879)     | 0.907   |
| Cancer                              | 1.054 (0.494-2.249)  | 0.891   | 0.801 (0.307-2.089)     | 0.650   |
| Coronary Artery Disease             | 1.733 (0.808-3.713)  | 0.158   | 0.511 (0.199-1.315)     | 0.164   |
| Atrial Fibrillation                 | 0.628 (0.229-1.723)  | 0.367   | 1.558 (0.580-4.183)     | 0.379   |
| Heart Failure                       | 1.486 (0.650-3.399)  | 0.348   | 0.449 (0.150-1.346)     | 0.153   |
| Liver Disease                       | 0.291 (0.043-1.983)  | 0.207   | 1.907 (0.352-10.332)    | 0.454   |
| <b>Labs</b>                         |                      |         |                         |         |
| WBC                                 | 1.034 (0.991-1.078)  | 0.119   | 1.034 (0.983-1.088)     | 0.192   |
| Creatinine > 1.2                    | 0.685 (0.414-1.133)  | 0.141   | 38.538 (11.297-131.468) | <0.001  |
| Anion Gap                           | 1.044 (0.999-1.091)  | 0.053   | 1.045 (1.001-1.091)     | 0.044   |
| Potassium                           | 1.132 (0.881-1.455)  | 0.334   | 1.059 (0.831-1.351)     | 0.642   |
| ALT                                 | 0.999 (0.996-1.002)  | 0.573   | 1.004 (1.000-1.007)     | 0.044   |
| <b>Hospital Conditions</b>          |                      |         |                         |         |
| Duration (days)                     | 1.053 (1.019-1.087)  | 0.002   | 1.007 (0.967-1.049)     | 0.723   |

Abbreviations: ACE-I, angiotensin-converting enzyme inhibitors; ARB, angiotensin receptor blockers; SBP, systolic blood pressure; DBP, diastolic blood pressure; COPD, chronic obstructive pulmonary disease; ALT, alanine aminotransferase.

**Table S6. ACE-I/ARB in-hospital use: adjusted odds ratios for COVID-19 in-hospital mortality in different race groups**

|                                     | All Races (N=5,240)  |         | African American (N=1,356) |         | Non-African American (N=3,884) |         |
|-------------------------------------|----------------------|---------|----------------------------|---------|--------------------------------|---------|
|                                     | Adjusted OR (95% CI) | p-value | Adjusted OR (95% CI)       | p-value | Adjusted OR (95% CI)           | p-value |
| <b>Antihypertensive Medications</b> |                      |         |                            |         |                                |         |
| ACE-I/ARB                           | 0.575 (0.419-0.791)  | 0.001   | 0.378 (0.188-0.760)        | 0.006   | 0.652 (0.449-0.946)            | 0.024   |
| Calcium-channel blockers            | 0.745 (0.577-0.964)  | 0.025   | 0.919 (0.549-1.540)        | 0.75    | 0.678 (0.501-0.919)            | 0.012   |
| Beta blockers                       | 1.218 (0.951-1.560)  | 0.118   | 1.229 (0.728-2.071)        | 0.44    | 1.265 (0.946-1.690)            | 0.113   |
| Diuretics                           | 1.908 (1.456-2.497)  | <0.001  | 1.775 (1.007-3.130)        | 0.047   | 1.887 (1.379-2.581)            | <0.001  |
| <b>Patient Characteristics</b>      |                      |         |                            |         |                                |         |
| Age                                 | 1.082 (1.071-1.094)  | <0.001  | 1.094 (1.069-1.120)        | <0.001  | 1.082 (1.069-1.096)            | <0.001  |
| Male                                | 0.944 (0.740-1.203)  | 0.639   | 1.178 (0.698-1.990)        | 0.539   | 0.908 (0.684-1.206)            | 0.505   |
| Race: African American              | 0.755 (0.548-1.040)  | 0.085   | N/A                        | N/A     | N/A                            | N/A     |
| Race: Asian                         | 0.835 (0.463-1.508)  | 0.551   | N/A                        | N/A     | N/A                            | N/A     |
| Race: Hispanic                      | 0.839 (0.614-1.148)  | 0.273   | N/A                        | N/A     | N/A                            | N/A     |
| Race: Other                         | 0.753 (0.516-1.097)  | 0.14    | N/A                        | N/A     | N/A                            | N/A     |
| Race: Unknown                       | 0.740 (0.375-1.459)  | 0.385   | N/A                        | N/A     | N/A                            | N/A     |
| Smoking Status: Not Asked           | 1.203 (0.888-1.631)  | 0.233   | 1.420 (0.746-2.705)        | 0.286   | 1.067 (0.749-1.520)            | 0.718   |
| Smoking Status: Quit                | 1.201 (0.898-1.608)  | 0.218   | 1.335 (0.715-2.494)        | 0.365   | 1.135 (0.808-1.595)            | 0.463   |
| Smoking Status: Yes                 | 1.624 (0.924-2.852)  | 0.092   | 3.963 (1.514-10.360)       | 0.005   | 0.757 (0.351-1.631)            | 0.476   |
| BMI                                 | 1.008 (0.992-1.024)  | 0.329   | 1.015 (0.984-1.046)        | 0.352   | 1.009 (0.989-1.028)            | 0.394   |
| Temperature                         | 0.983 (0.929-1.040)  | 0.548   | 0.946 (0.803-1.117)        | 0.518   | 0.988 (0.929-1.051)            | 0.709   |
| Max. Temperature                    | 1.235 (1.150-1.326)  | <0.001  | 1.206 (1.034-1.406)        | 0.017   | 1.255 (1.155-1.363)            | <0.001  |
| O2 Saturation                       | 0.992 (0.973-1.011)  | 0.409   | 0.987 (0.946-1.028)        | 0.533   | 0.997 (0.975-1.019)            | 0.784   |
| Min. O2 Saturation                  | 0.937 (0.927-0.946)  | <0.001  | 0.950 (0.934-0.966)        | <0.001  | 0.931 (0.919-0.943)            | <0.001  |
| Heart Rate                          | 1.003 (0.997-1.010)  | 0.284   | 0.998 (0.985-1.012)        | 0.818   | 1.004 (0.996-1.011)            | 0.325   |
| Respiratory Rate > 25               | 1.339 (0.977-1.833)  | 0.069   | 1.336 (0.619-2.883)        | 0.461   | 1.339 (0.941-1.904)            | 0.105   |
| High BP (SBP>140 or DBP>90)         | 0.873 (0.687-1.108)  | 0.265   | 0.787 (0.477-1.298)        | 0.348   | 0.868 (0.654-1.150)            | 0.325   |
| <b>Comorbidities</b>                |                      |         |                            |         |                                |         |
| Asthma                              | 0.548 (0.304-0.989)  | 0.046   | 0.222 (0.051-0.965)        | 0.045   | 0.650 (0.330-1.281)            | 0.213   |
| COPD                                | 1.575 (0.893-2.779)  | 0.117   | 1.793 (0.586-5.490)        | 0.307   | 1.610 (0.804-3.222)            | 0.179   |
| Hypertension                        | 0.903 (0.672-1.213)  | 0.497   | 0.734 (0.386-1.398)        | 0.347   | 0.975 (0.692-1.373)            | 0.886   |
| Obstructive Sleep Apnea             | 1.465 (0.590-3.644)  | 0.411   | 0.647 (0.122-3.428)        | 0.609   | 1.958 (0.654-5.859)            | 0.23    |
| Obesity                             | 0.863 (0.525-1.419)  | 0.563   | 2.411 (0.944-6.160)        | 0.066   | 0.553 (0.294-1.039)            | 0.066   |
| Diabetes                            | 1.043 (0.757-1.436)  | 0.799   | 1.188 (0.602-2.344)        | 0.619   | 0.949 (0.652-1.381)            | 0.785   |

|                            |                     |        |                      |        |                     |        |
|----------------------------|---------------------|--------|----------------------|--------|---------------------|--------|
| Chronic Kidney Disease     | 1.006 (0.665-1.522) | 0.978  | 0.975 (0.448-2.125)  | 0.95   | 1.033 (0.623-1.713) | 0.9    |
| HIV                        | 2.460 (0.978-6.178) | 0.056  | 1.354 (0.141-12.975) | 0.793  | 2.729 (0.942-7.901) | 0.064  |
| Cancer                     | 1.335 (0.914-1.952) | 0.135  | 2.113 (0.962-4.637)  | 0.063  | 1.068 (0.681-1.675) | 0.775  |
| Coronary Artery Disease    | 1.323 (0.902-1.939) | 0.151  | 1.891 (0.774-4.618)  | 0.162  | 1.203 (0.779-1.861) | 0.404  |
| Atrial Fibrillation        | 0.874 (0.553-1.381) | 0.564  | 1.112 (0.369-3.353)  | 0.851  | 0.860 (0.512-1.445) | 0.569  |
| Heart Failure              | 0.892 (0.537-1.480) | 0.659  | 0.638 (0.219-1.857)  | 0.409  | 0.928 (0.511-1.685) | 0.806  |
| Liver Disease              | 1.275 (0.610-2.667) | 0.519  | 2.330 (0.406-13.370) | 0.343  | 1.307 (0.579-2.954) | 0.519  |
| Acute Kidney Injury        | 1.067 (0.672-1.692) | 0.783  | 0.473 (0.194-1.153)  | 0.099  | 1.619 (0.909-2.883) | 0.102  |
| <b>Labs</b>                |                     |        |                      |        |                     |        |
| WBC                        | 1.009 (0.985-1.033) | 0.468  | 0.992 (0.942-1.045)  | 0.765  | 1.015 (0.988-1.044) | 0.279  |
| Creatinine > 1.2           | 1.659 (1.261-2.181) | <0.001 | 1.980 (1.099-3.564)  | 0.023  | 1.584 (1.155-2.173) | 0.004  |
| Anion Gap                  | 1.087 (1.053-1.121) | <0.001 | 1.060 (1.003-1.121)  | 0.04   | 1.102 (1.058-1.147) | <0.001 |
| Potassium                  | 1.177 (1.018-1.361) | 0.027  | 1.053 (0.813-1.363)  | 0.695  | 1.236 (1.033-1.480) | 0.021  |
| ALT                        | 1.001 (0.999-1.002) | 0.358  | 1.001 (0.998-1.005)  | 0.397  | 1.000 (0.999-1.002) | 0.585  |
| <b>Hospital Conditions</b> |                     |        |                      |        |                     |        |
| ICU                        | 4.255 (3.149-5.749) | <0.001 | 9.393 (4.802-18.394) | <0.001 | 3.397 (2.404-4.807) | <0.001 |
| Duration (days)            | 0.967 (0.950-0.984) | <0.001 | 0.972 (0.937-1.009)  | 0.141  | 0.964 (0.945-0.983) | <0.001 |

Abbreviations: ACE-I, angiotensin-converting enzyme inhibitors; ARB, angiotensin receptor blockers; SBP, systolic blood pressure; DBP, diastolic blood pressure; COPD, chronic obstructive pulmonary disease; ALT, alanine aminotransferase.

**Table S7. Inverse propensity-weighted logistic regression results for COVID-19 in-hospital mortality in different race groups and ACE-I/ARB exposure time**

| <b>Drug (Year 2019-2020)</b> | <b>All Races</b>            |                | <b>African American</b>     |                | <b>Non-African American</b> |                |
|------------------------------|-----------------------------|----------------|-----------------------------|----------------|-----------------------------|----------------|
|                              | <b>Adjusted OR (95% CI)</b> | <b>p-value</b> | <b>Adjusted OR (95% CI)</b> | <b>p-value</b> | <b>Adjusted OR (95% CI)</b> | <b>p-value</b> |
| <b>ACE-I/ARB use</b>         |                             |                |                             |                |                             |                |
| Anytime use                  | 0.673 (0.511-0.886)         | 0.005          | 0.381 (0.204-0.712)         | 0.003          | 0.765 (0.556-1.052)         | 0.100          |
| In-hospital use              | 0.577 (0.418-0.795)         | < 0.001        | 0.307 (0.140-0.672)         | 0.003          | 0.653 (0.450-0.948)         | 0.025          |
| Outpatient use               | 0.941 (0.626-1.415)         | 0.770          | 0.534 (0.224-1.273)         | 0.157          | 0.927 (0.567-1.518)         | 0.764          |
| <b>ACE-I use</b>             |                             |                |                             |                |                             |                |
| Anytime use                  | 0.951 (0.689-1.313)         | 0.761          | 0.684 (0.321-1.458)         | 0.326          | 1.016 (0.708-1.456)         | 0.933          |
| In-hospital use              | 0.724 (0.489-1.071)         | 0.106          | 4.113 (0.409-41.37)         | 0.230          | 0.787 (0.496-1.250)         | 0.311          |
| Outpatient use               | 1.347 (0.846-2.144)         | 0.209          | 0.824 (0.192-3.526)         | 0.794          | 1.730 (0.970-3.086)         | 0.063          |
| <b>ARB use</b>               |                             |                |                             |                |                             |                |
| Anytime use                  | 0.636 (0.464-0.870)         | 0.005          | 0.428 (0.190-0.966)         | 0.041          | 0.655 (0.454-0.946)         | 0.024          |
| In-hospital use              | 0.514 (0.340-0.775)         | 0.002          | 0.144 (0.049-0.428)         | < 0.001        | 0.609 (0.384-0.966)         | 0.035          |
| Outpatient use               | 0.761 (0.480-1.209)         | 0.248          | 0.637 (0.187-2.166)         | 0.470          | 0.594 (0.351-1.005)         | 0.053          |

**Table S8. ACE-I/ARB and potential confounding medication categories including detailed medication names**

| <b>Medication Category</b> | <b>Medication Names</b>                                                                                                                                                                                        |
|----------------------------|----------------------------------------------------------------------------------------------------------------------------------------------------------------------------------------------------------------|
| ACE-I                      | Benazepril hydrochloride, Captopril, Enalapril maleate, Fosinopril sodium, Lisinopril, Moexipril, Perindopril, Quinapril hydrochloride, Ramipril, Trandolapril                                                 |
| ARB                        | Azilsartan, Candesartan, Eprosartan mesylate, Irbesartan, losartan potassium, Olmesartan, Telmisartan, Valsartan                                                                                               |
| Diuretics                  | Chlorthalidone, Chlorothiazide, Hydrochlorothiazide, Indapamide, Metolazone, Amiloride hydrochloride, Spironolactone, Triamterene, Eplerenone, Furosemide, Bumetanide, Torsemide, Ethacrynic acid              |
| Beta Blockers              | Acebutolol, Atenolol, Betaxolol, Bisoprolol fumarate, Carteolol hydrochloride, Metoprolol, Nadolol, Nebivolol, Penbutolol sulfate, Pindolol, Propranolol hydrochloride, Solotol hydrochloride, Timolol maleate |
| Calcium-channel Blockers   | Amlodipine, Bepridil, Diltiazem hydrochloride, Felodipine, Isradipine, Nicardipine, Nifedipine, Nisoldipine, Verapamil hydrochloride                                                                           |

Abbreviations: ACE-I, angiotensin-converting enzyme inhibitors; ARB, angiotensin receptor blockers.
